# Supplementary material
Source: PubMed Central journal article supplement (PMC2584681)
Supplement: 0809623105_0809623105SI.pdf [file 0809623105_0809623105SI.pdf]

# Supporting Information

Yoshinaga et al. 10.1073/pnas.0809623105

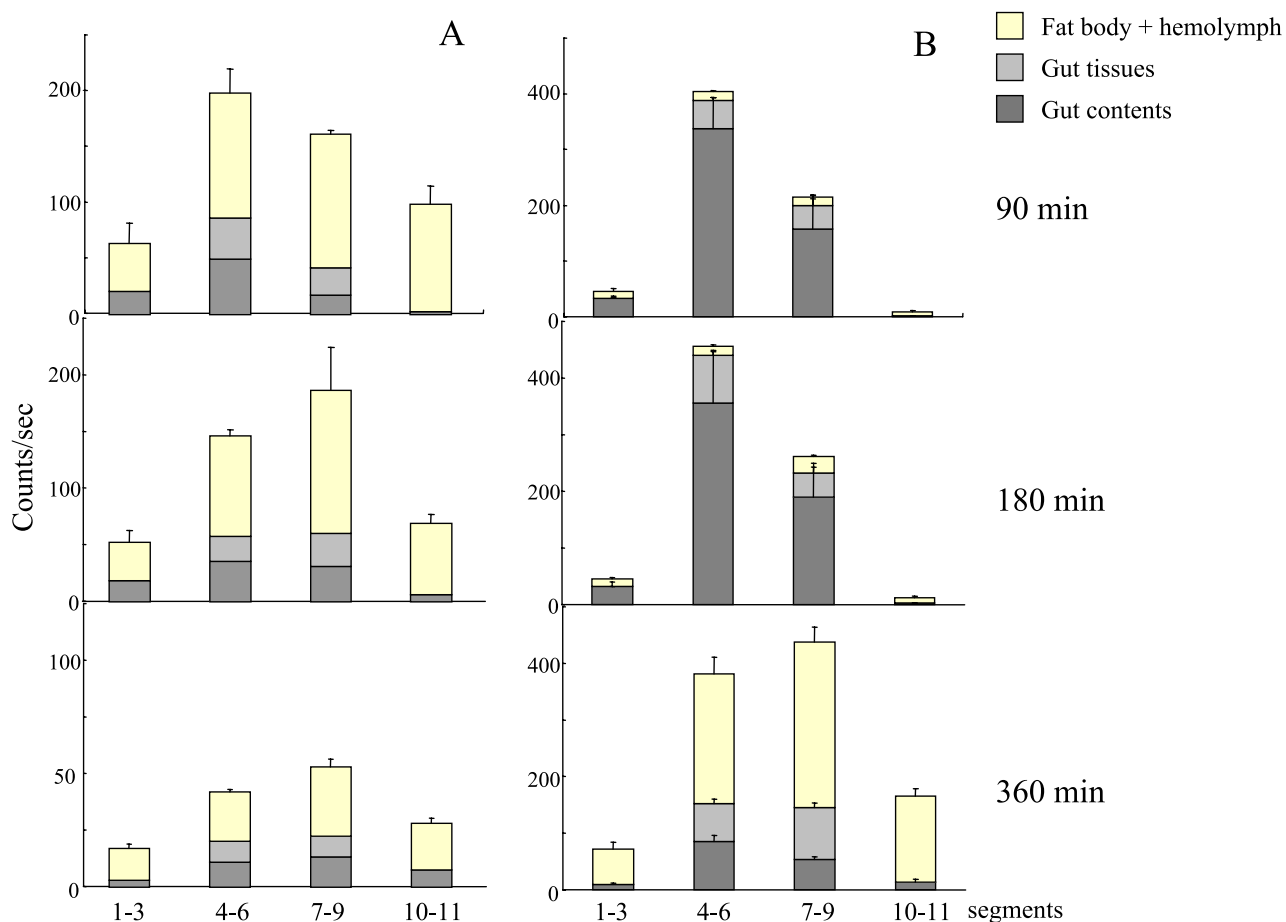

**Fig. S1.** Absorption and distribution of L-[U-<sup>14</sup>C]glutamine (A) and  $\alpha$ -[1-<sup>14</sup>C]linolenic acid (B) by the last instar of *Spodoptera litura* larvae 90, 180, and 360 min after feeding. Segments 1–3, 4–6, 7–9, and 10–11 contain crop, midgut anterior, midgut posterior, and hindgut, respectively. The data are shown as mean ( $\pm$  SEM,  $n = 3$ ).
